# Supplementary material for: Bromine speciation and partitioning in slab-derived fluids and melts: Implications for halogens recycling in subduction zones
Source: Copernicus journal article supplement (doi:10.5194/se-2019-205), 2020-01-10
Supplement: Supplementary file [file se-2019-205-AC1-supplement.pdf]

### Answer to Referee 1:

First of all, we would like to thank Referee 1 for appreciating the relevance of our *in-situ* study to further the current understanding of halogen deep cycle.

The referee's concerns are addressed as follows:

**Comment 1:** The results about partitioning are equivalent to those of a previous published study by another group (nothing new) and the discussion about one low pressure result (at 0.2 GPa) is not convincing (see specific comments below). The results about bromine speciation in high pressure fluids are new and they deserve to be published, unfortunately the partitioning of Br is not measured for the same chemical system (haplogranite, HPG) than its speciation ( $\text{Na}_2\text{Si}_2\text{O}_5$ , NS2), which makes any comparison difficult. Therefore I would recommend to delete the part about partitioning, or at least to provide convincing explanation (see specific comments), and to focus on the speciation results.

### Answers:

- While the *in-situ* Br partitioning experiments are not the first of their kind, they provide a unique opportunity for cross-checking experimental reproducibility and thus, we believe they deserve to be included in the manuscript. References to previous work by Bureau can be found throughout the manuscript and the favourable comparison between their and our studies further supports the reliability of the *in-situ* measurements. It should be stressed that *in-situ* measurements as those reported here and in rare previous work are extremely challenging, but the only reliable way to assess element partitioning and speciation at extreme P-T conditions, and thus any new data would be a valuable contribution to the field. **Therefore, we prefer to keep the partitioning experiments as part of the current manuscript.**
- Partitioning experiments involved haplogranite melts (Si, Al, Na, K), while Br speciation in melts could only be determined for sodium disilicate ( $\text{Na}_2\text{Si}_2\text{O}_5$ ) due to insufficient Br concentrations in the haplogranite melt (400-2000 ppm Br). Yet, both XANES and EXAFS analyses (Figures 4 and 5; Table 3) show that Br local environment is very similar in the haplogranite and NS2 glasses. Thus, it can be expected that Br incorporation mechanism in both melts is similar and controlled by the presence of alkalis, either Na or K, and that all peralkaline silicate melts will have affinity to incorporate high amounts of Br under high P-T conditions. A note has been added in **Lines 479-482** to clarify this point and emphasize the similarities between the haplogranite and NS2 systems.
- We believe that underlining the differences between our low  $P D_{\text{Br}}$  (4.8 at 800 °C, 0.2 GPa) and those of Bureau et al. and Cadoux et al (17.5-20.2 at 900 °C, 0.2 GPa) is of relevance to this study to **highlight that significant amounts of Br (and Cl) may be retained in degassed lavas, as reported in natural context.** The discussion has been modified to highlight this point (**Lines 356-364**).

**Comment 2:** Br partition coefficients (D) are measured *in situ* for HPG system within the range 0.2 – 1.7 GPa and 592 – 840 °C: they are ranging from 4.1 to 15.3, they fall in the same range than those from Bureau et al., 2010, for similar conditions (0.66 – 1.7 GPa, 590-890°C, D from 2.18 to 9.2). However, if one plots all results in a diagram D versus pressure, data exhibits a lot of dispersion and no real relationship, as it should be expected (i.e. an increase of D with decompression due to degassing). This is not discussed at all.

### Answer:

- Referee 1 was right to point out the dispersion of the data and the apparent lack of correlation with P. A similar lack of pressure dependency (as well as density, or composition) has previously been reported for vapour/brine partitioning of some metals (Cu, Au, Ag). It was suggested that large differences in the speciation of these elements in both phases could be

responsible for such a behaviour (Pokrovski et al., 2008). We thus suggest that the large differences in Br chemical and structural environment in between the coexisting fluid and melt phase could as well explain the scattered  $D_{Br}$  in our study and the apparent lack of simple trends with P, density or dissolved silicate content, since the physical-chemical controls of Br in the two phases are very different due to the different speciation. We would also like to point out that with a single exception at 0.2 GPa, all our data were recorded at  $P > 0.5$  GPa, where the existing studies have also shown that  $D_{Br}$  values do not change significantly with pressure and exhibit a similar degree of scattering, between 1 and 10 (Bureau et al., 2010).

- We also note that additional discrepancies may arise from uncertainties on the estimation of the fluid composition, which will affect the calculated  $D_{Br}$ . We, for instance, recognize that the large  $D_{Br}$  value obtained at 1.7 GPa is clearly off the trend, probably due to the fact that the fluid composition was calculated using the albite solubility data of Wohlers et al. (2011) instead of Anderson and Burnham (1983), to take into account the higher P conditions in this experiment.
- We have added an additional discussion in the revised manuscript, both in the Results section (**Lines 316-342**) and in the Methods section, where we provide additional details about uncertainties on fluid and melt compositions and how they translate to the  $D_{Br}$  (**Lines 179-186 and 240-258**). We also agree with this referee that the discussion of the temperature effect in a single experimental run was of weak relevance in terms of partitioning behaviour, and hence we have removed it from the revised manuscript.
- The conclusions drawn from our partitioning experiments, however, remain unchanged: we confirm that although Br preferentially partitions into the aqueous fluid over silicate melt, high amounts of Br can yet be incorporated in hydrous granitic melts. To strengthen this argument, we added an estimation of Br concentration range in the high P-T melts of this study, calculated using the in-situ  $D_{Br}$  and initial phase proportions (**Lines 339-340**).

**Comment 3:** About the same value of D is obtained at 0.9, 0.8, 0.65, 0.2 GPa, respectively 4.4, 4.2, 4.1, and 4.8. High values of D are obtained at high investigated pressure (15 at 0.9 GPa and 9.7 at 1.7 GPa) where unity would be expected due to imminent total miscibility. Why? Such a discrepancy may be due to the pressure determination. The authors use the diffraction of gold and its equation of state. However, it is well known that gold diffraction is not a good tool to for low pressure determination, as an example see Heinz and Jeanloz, JAP, 1983, where the first measurements are performed at 4.42GPa. Furthermore, in a recent intercomparison of the use of EOS for pressure determination (including Au), Ye et al., JGR, 2017, it is conclude that at high temperature, accuracy cannot be better than 1 GPa, from 2.5 GPa up to 140. For that reason, the discussion from line 278 to 294 is not relevant and should be suppressed.

**Answer:**

- The choice of gold as the in-situ pressure calibrant was motivated by its chemical stability in high P-T fluids and melts. Although we agree that the absolute accuracy of this method may not be better than 1 GPa (Ye et al., 2017), the actual relative precision is much better and is likely to be within 10% of the P value, as reported in Louvel et al. (2014). Moreover, the unit cell volume of Au displayed systematic changes as a function of increasing P-T in the HDAC, thus demonstrating that Au is sensitive to relatively small pressure changes during the run, and special care was taken in the HDAC alignment/centering to preserve the sample-detector distance to ensure the reliability of the unit cell volume variations. Therefore, we are confident that the relative pressure variations during the run are captured by the Au pressure calibrant. To further support the appropriate pressure determination, we emphasize that the phase relations, including miscibility, in the haplogranite-H<sub>2</sub>O system are within the P-T range reported for other alkali silicate systems (e.g. Paillat et al., 1992; Stalder et al., 2000).

- As mentioned above, additional discussion on the uncertainties of our calculations is now added both in the methods and result sections. Note that all fluid and melt properties (composition, density and effective transmission) were calculated assuming an uncertainty on pressure determination of 10% (**Lines 183-186 and 245-246**).

**Additional comments:**

- The title has been updated to specify the nature of fluids (ie., aqueous) and melts (ie., silicate).
- Supplementary materials have been incorporated into the main manuscript text to better provide the reader with as many details as possible and to better address the reviewers' concerns (**Lines 103-108; 115-118; 121-130**).
- A set of dashed lines was added to Figure 5 to underline the shift of EXAFS oscillations with change in composition. The caption of the figure was changed accordingly.
